## CORRESPONDENCE

between World Wars I and II. Although the device was used as a ventilator in several hospitals, few contemporaries took the idea of ACD-CPR seriously.<sup>6</sup> In 1994 Smithline *et al.*,<sup>10</sup> using a Hayek Oscillator (Breasy Medical, London, UK) as a substitute for the Biomotor, confirmed his findings.

**Katharina P. Koetter, M.D.**  
Neurological Critical Care Unit  
Leopoldina-Hospital  
Schweinfurt, Germany  
**Wolfgang H. Maleck, A.R.Z.T.**  
Anesthesiology  
Klinikum Ludwigshafen  
Ludwigshafen, Germany

## References

1. Juvin P, Desmots JM: Cardiac massage. A method rescued from oblivion. *ANESTHESIOLOGY* 1998; 89:771-6
2. Balassa (J): Jelvényes gögvizdag fekélyes gögporckörilob következtében; tetszhalál, megmentés gögmetszés által. (Oedema glottidis symptomaticum ex perichondrite laryngeali ulcerosa—asphyxia—laryngotomia cum exitu fausto). *Orvosi Hetilap* 1858; 2:653-9

Anesthesiology

1999; 90:1491

© 1999 American Society of Anesthesiologists, Inc.  
Lippincott Williams & Wilkins, Inc.

*In Reply:*—We thank Dr. Koetter and Dr. Maleck for commending our work on the history, in Europe and the United States, of the discovery of cardiac massage. Their remarks are interesting but call for a number of comments about the facts and the thrust of our article.

Janos Balassa did indeed report experimenting with compression of the chest, but he shared with a very large number of authors of the time the goal of achieving artificial ventilation, as opposed to cardiac massage. His own words leave no room for ambiguity: "I exerted bellows-like rhythmic pressure to the chest imitating breathing."<sup>1</sup> As for Eisenmenger, we agree that he made a large contribution to the history of cardiac massage. He developed a technique of compression of the chest and abdomen similar to that described by Crile.<sup>2</sup> His primary goal, however, was to improve ventilation rather than circulation, as pointed out recently by Koetter and Maleck: "In 1900 . . . a device for suction on the upper thorax is proposed as a method to improve ventilation of the lung apices in tuberculosis."<sup>3</sup> Only later, at a time when the scientific community had accepted cardiac massage and was aware of the results obtained by Crile, did Eisenmenger suggest that his technique be used in circulatory arrest.

Beyond the raw historical facts, our main objective was to analyze why a technique (external cardiac massage) fell into oblivion after being developed and widely commented on by the scientific community. To illustrate how extraordinary was this passage into limbo, we selected those American and European experiments that were per-

3. Husveti S, Ellis H: Janos Balassa, pioneer of cardiac resuscitation. *Anaesthesia* 1969; 24:113-5
4. Robicsek F, Littmann L: The first reported case of external heart massage. *Clin Cardiol* 1983; 6:569-71
5. Eisenmenger R: Ein Apparat zur künstlichen Atmung. *Wien Med Wochenschr* 1903; 53:1730-3
6. Koetter KP, Maleck WH, Petroianu GA, Ghisoiu S: Eisenmengers biomotor—predecessor of active-compression-decompression cardiopulmonary resuscitation, Proceedings of the Fourth International Symposium on the History of Anaesthesia. Edited by Schulte am Esch J, Goerig M. Lübeck, Dräger, 1998, pp 405-20
7. Eisenmenger R: Die Bedeutung der Saug- und Druckmassage des Bauches. *Zeitschrift für physikalische und diätetische Therapie* 1911; 15:737-42
8. Eisenmenger R: Tierversuche mit dem Apparat zur Erzielung künstlicher Atmung, Biomotor. *Wien Klin Wochenschr* 1929; 42:1502-3
9. Eisenmenger R: Anwendungsgebiete und Erfolge der künstlichen Atmung mittels Biomotor. *Ther Ggw* 1942; 83:363-8
10. Smithline HA, Rivers EP, Rady MY, Blake HC, Nowak RM: Biphasic extrathoracic pressure CPR. A human pilot study. *Chest* 1994; 105:842-6

(Accepted for publication January 14, 1999.)

formed earliest and that made the largest contributions to scientific debate at the beginning of the twentieth century.

**Philippe Juvin, M.D.**  
**Jean Marie Desmots, M.D.**  
Chairman  
Department of Anesthesia and Intensive Care  
Bichat Hospital  
Paris, France  
philippe.juvin@bch.ap-hop-paris.fr

## References

1. Robicsek F, Littmann L: The first reported case of external cardiac massage. *Clin Cardiol* 1983; 6:569-71
2. Juvin P, Desmots JM: Cardiac massage. A method rescued from oblivion. *ANESTHESIOLOGY* 1998; 89:771-6
3. Koetter KP, Maleck WH, Petroianu GA, Ghisoiu S: Eisenmengers biomotor. Predecessor of active-compression-decompression cardiopulmonary active resuscitation, Proceedings of the Fourth International symposium on the history of anaesthesia. Edited by Schulte am Esch J, Goering M. Dräger, Lübeck, 1998, pp 405-20

(Accepted for publication January 14, 1999.)
